# Supplementary material
Source: PubMed Central journal article supplement (PMC2612486)
Supplement: MCB.01415-08_2.pdf [file MCB.01415-08_2.pdf]

| Human<br>Protein name                         | <i>Drosophila melanogaster</i>       |          |            |                       | mRNP<br>Ftz-M3 |     |     | mRNP<br>FtzΔI-M3 |     |     | mRNP<br>AdML-M3<br>(ref 33) | mRNP<br>AdMLΔI-M3<br>(ref 33) |
|-----------------------------------------------|--------------------------------------|----------|------------|-----------------------|----------------|-----|-----|------------------|-----|-----|-----------------------------|-------------------------------|
|                                               | GenBank<br>accession #<br>(ref.seq.) | CG #     | Gene name  | Mol.<br>Mass<br>(kDa) | # 1            | # 2 | # 3 | # 1              | # 2 | # 3 |                             |                               |
| <b>EJC and TREX</b>                           |                                      |          |            |                       |                |     |     |                  |     |     |                             |                               |
| THOC1                                         | gi 24644436                          | CG2031   | Hpr1       | 80.8                  |                |     | 1   |                  |     |     | •                           | •                             |
| Upf3                                          | gi 24762428                          | CG11184  | Upf3       | 56.3                  |                |     | 4   |                  |     |     |                             |                               |
| Pinin                                         | gi 161078140                         | CG8383   | Pnn        | 35.9                  | 1              |     |     |                  |     |     | •                           |                               |
| <b>SR-proteins</b>                            |                                      |          |            |                       |                |     |     |                  |     |     |                             |                               |
| SFRS12                                        | gi 17137528                          | CG4602   | Srp54      | 58.5                  |                |     |     | 1                |     |     |                             |                               |
| <b>hnRNP</b>                                  |                                      |          |            |                       |                |     |     |                  |     |     |                             |                               |
| *                                             | gi 161078453                         | CG17838  |            | 76.9                  |                |     | 1   |                  |     |     | •                           | •                             |
| <b>Co-purifying<br/>snRNP proteins</b>        |                                      |          |            |                       |                |     |     |                  |     |     |                             |                               |
| SF3b155                                       | gi 45550087                          | CG2807   |            | 149.6                 |                |     |     |                  |     |     | •                           |                               |
| SF3a120                                       | gi 24647566                          | CG16941  |            | 88.1                  | 1              |     |     |                  |     |     | •                           |                               |
| SmD3                                          | gi 24652901                          | CG8427   | SmD3       | 15.6                  |                |     |     | 1                |     |     | •                           |                               |
| U4/U6-15.5K                                   | gi 17864298                          | CG3949   | hoi-polloi | 13.8                  |                |     |     |                  |     | 1   |                             |                               |
| SmG                                           | gi 29428065                          | CG9742   |            | 12.7                  |                |     | 1   |                  |     |     |                             |                               |
| SF3b14b                                       | gi 24582237                          | CG9548   |            | 12.5                  | 1              |     |     |                  |     |     |                             |                               |
| SmE                                           | gi 24582631                          | CG18591  |            | 11.1                  | 2              |     |     | 2                |     |     |                             |                               |
| <b>Co-purifying<br/>spliceosomal proteins</b> |                                      |          |            |                       |                |     |     |                  |     |     |                             |                               |
| S164/RBM25                                    | gi 18857955                          | CG4119   |            | 112.7                 |                |     | 1   | 2                |     |     |                             |                               |
| FBP11                                         | gi 24581324                          | CG3542   |            | 91.3                  | 2              |     |     |                  |     | 1   |                             |                               |
| CRNKL1/Cif1                                   | gi 17137126                          | CG3193   | crn        | 84.3                  |                |     | 3   |                  |     |     |                             |                               |
| ZCCHC6                                        | gi 28573195                          | CG1091   |            | 63.9                  |                |     |     | 3                |     |     |                             |                               |
| NF45/ILF2                                     | gi 21357109                          | CG5641   |            | 43.7                  |                |     |     | 1                |     |     | •                           | •                             |
| hsp27                                         | gi 17647521                          | CG4466   | Hsp27      | 23.6                  | 1              |     |     |                  |     |     |                             |                               |
| CGI-79                                        | gi 20129641                          | CG10466  |            | 17.8                  |                | 1   |     |                  |     |     |                             |                               |
| <b>Misc.</b>                                  |                                      |          |            |                       |                |     |     |                  |     |     |                             |                               |
| n.h.                                          | gi 24659555                          | CG32394  |            | 267.8                 | 3              |     |     |                  | 3   |     |                             |                               |
| LOC727957                                     | gi 21358121                          | CG12132  | c11.1      | 193.1                 |                |     |     |                  | 2   |     |                             |                               |
| INOC1                                         | gi 24648168                          | CG31212  | Ino80      | 187.1                 | 2              |     |     |                  |     |     |                             |                               |
| KLAA1109                                      | gi 24584764                          | CG15134  |            | 158.1                 |                |     |     |                  |     | 2   |                             |                               |
| RSBN1L                                        | gi 24585053                          | CG10600  |            | 150.6                 | 1              |     |     |                  |     |     |                             |                               |
| RBBP6                                         | gi 19922884                          | CG3231   | mmn        | 139.0                 |                |     |     |                  |     | 1   |                             |                               |
| SAP130?                                       | gi 45551553                          | CG11006  |            | 123.6                 |                |     |     |                  | 2   |     |                             |                               |
| RNF40                                         | gi 24658707                          | CG10542  | Bre1       | 119.1                 |                | 1   |     |                  |     |     |                             |                               |
| DIS3L2                                        | gi 24654597                          | CG16940  |            | 116.8                 |                |     |     |                  |     | 2   |                             |                               |
| TTC14                                         | gi 28573095                          | CG6621   |            | 99.9                  |                |     |     |                  |     | 3   |                             |                               |
| ZER1                                          | gi 24655224                          | CG12084  |            | 90.3                  |                | 2   |     |                  |     | 3   |                             |                               |
| n.h.                                          | gi 161077886                         | CG8949   |            | 89.4                  |                |     |     | 2                |     |     |                             |                               |
| PFKM                                          | gi 28573326                          | CG4001   | Pfk        | 86.7                  |                |     |     |                  |     | 2   |                             |                               |
| n.h.                                          | gi 21356847                          | CG14735  |            | 81.4                  | 1              |     |     |                  |     |     |                             |                               |
| n.h.                                          | gi 18858015                          | CG12239  |            | 80.2                  |                |     | 2   |                  |     |     |                             |                               |
| n.h.                                          | gi 161077060                         | CG8603   |            | 76.7                  |                |     |     |                  |     | 2   |                             |                               |
| n.h.                                          | gi 161083621                         | CG32121  |            | 69.6                  |                |     | 2   |                  |     |     |                             |                               |
| n.h.                                          | gi 24650208                          | CG14540  |            | 68.6                  |                |     |     | 1                |     |     |                             |                               |
| TADA2L                                        | gi 62472701                          | CG33520  | Rpb4       | 65.6                  |                |     |     |                  |     | 2   |                             |                               |
| CTTNBP2NL                                     | gi 20304119                          | CG10915  |            | 65.4                  | 2              |     |     |                  |     | 2   |                             |                               |
| FASTKD5?                                      | gi 28574107                          | CG4619   |            | 64.3                  |                |     |     | 1                |     |     |                             |                               |
| ZCCHC8?                                       | gi 85725070                          | CG4622   |            | 62.4                  |                |     |     | 1                |     |     |                             |                               |
| KHDRBS2                                       | gi 24658086                          | CG3613   | QKR58E-1   | 42.3                  |                |     |     |                  |     | 1   |                             |                               |
| CSTF2                                         | gi 17137710                          | CG7697   | CStF-64    | 46.2                  | 1              |     |     | 3                |     |     |                             |                               |
| n.h.                                          | gi 92109988                          | IP04354p |            | 31.1                  |                | 2   |     |                  |     |     |                             |                               |
| n.h.                                          | gi 24762837                          | CG30428  |            | 30.0                  |                |     |     |                  |     | 2   |                             |                               |
| PRDX4                                         | gi 24656348                          | CG1274   | Jafrac2    | 26.7                  | 1              |     |     |                  |     |     |                             |                               |
| n.h.                                          | gi 17137034                          | CG18285  | igloo      | 25.0                  |                |     |     | 2                |     |     |                             |                               |
| RPB5                                          | gi 19922004                          | CG11979  | rpb5       | 24.5                  |                | 1   |     |                  |     |     |                             |                               |
| TFIIB                                         | gi 19921082                          | CG5343   |            | 23.3                  | 1              |     |     |                  |     | 2   |                             |                               |
| PRDX2                                         | gi 24641739                          | CG1633   | Jafrac1    | 21.7                  |                | 1   |     |                  |     |     |                             |                               |
| TMCO1                                         | gi 24585112                          | CG10470  |            | 20.9                  |                |     |     |                  |     | 2   |                             |                               |
| n.h.                                          | gi 78706682                          | CG33770  |            | 20.7                  |                | 5   | 3   |                  |     |     |                             |                               |
| EIF4E                                         | gi 21358005                          | CG1442   | eIF4E-6    | 20.2                  |                |     |     |                  |     | 1   |                             |                               |
| n.h.                                          | gi 24650092                          | CG12250  |            | 16.5                  | 6              |     |     |                  |     |     |                             |                               |
| THEM2                                         | gi 24656147                          | CG16986  |            | 15.8                  |                |     |     | 2                |     |     |                             |                               |
| HIST2H3                                       | gi 24585677                          | CG31613  | His 3      | 15.4                  |                |     |     | 1                |     |     |                             |                               |
| NXT2                                          | gi 19922840                          | CG12752  | Nxt1       | 15.2                  |                | 1   |     |                  |     |     |                             |                               |
| n.h.                                          | gi 161075992                         | CG40271  |            | 15.0                  |                |     |     |                  |     | 2   |                             |                               |
| PFDN1                                         | gi 19920798                          | CG13993  |            | 14.8                  |                | 2   |     |                  |     |     |                             |                               |
| n.h.                                          | gi 17647279                          | CG6533   | Cp16       | 14.3                  |                |     |     |                  |     | 2   |                             |                               |
