# Supplementary material
Source: PubMed Central journal article supplement (PMC2612486)
Supplement: MCB.01415-08_3.pdf [file MCB.01415-08_3.pdf]

| <i>Drosophila melanogaster</i> |                                   |         |                  | Presence in            |            |            | Motifs                | Biochemical function        | Human        |                  |
|--------------------------------|-----------------------------------|---------|------------------|------------------------|------------|------------|-----------------------|-----------------------------|--------------|------------------|
| Gene name                      | GenBank accession #<br>(ref.seq.) | CG #    | Mol. Mass<br>kDa | spliceosomal complexes |            |            |                       |                             | Protein name | Mol. Mass<br>kDa |
|                                |                                   |         |                  | B<br>(Zeste)           | B<br>(Ftz) | C<br>(Ftz) |                       |                             |              |                  |
| <b>Ftz + Zeste</b>             |                                   |         |                  |                        |            |            |                       |                             |              |                  |
| Cdc27                          | gi 24659892                       | CG8610  | 101.3            | •                      | •          |            | TPR                   | cell cycle (?)              | CDC27        | 91.9             |
|                                | gi 24648185                       | CG5316  | 76.5             | •                      | •          |            | HIT                   | DNA repair                  | APTX         | 40.7             |
|                                | gi 45550712                       | CG9684  | 71.9             | •                      | •          |            | zf-MYND, TUDOR        |                             | n.h.         |                  |
| exu                            | gi 24656457                       | CG8994  | 58.0             | •                      | •          |            |                       | bicoid localization         | n.h.         |                  |
|                                | gi 24665973                       | CG7564  | 48.4             | •                      | •          |            | LUC7 domain           | pre-mRNA splicing(?)        | LUC7-like    | 46.5             |
| REG                            | gi 18860055                       | CG1591  | 28.1             | •                      |            | •          | PA28 alpha/beta       | proteasome                  | PSME3        | 29.5             |
|                                | gi 19922308                       | CG11808 | 25.7             | •                      |            | •          |                       |                             | n.h.         |                  |
| aub                            | gi 161076864                      | CG6137  | 98.6             | •                      | •          | •          | PAZ, PIWI             | oskar localization          | PIWIL1       | 98.6             |
| pep                            | gi 45553181                       | CG6143  | 78.1             | •                      | •          | •          | zf C2H2               |                             | n.h.         |                  |
| growl                          | gi 161078016                      | CG14648 | 58.8             | •                      | •          | •          | 5-FTHF cyc-lig        | folic acid biosynthesis (?) | MTHFSD       | 42.3             |
|                                | gi 24641752                       | CG15747 | 44.7             | •                      | •          | •          |                       |                             | n.h.         |                  |
| QKR58E-1                       | gi 24658086                       | CG3613  | 42.3             | •                      | •          | •          | KH domain             |                             | KHDRBS2      | 38.9             |
| <b>Ftz only</b>                |                                   |         |                  |                        |            |            |                       |                             |              |                  |
| rin                            | gi 24646611                       | CG9412  | 75.0             |                        | •          | •          | NTF-2 domain, RRM     |                             | G3BP2        | 54.1             |
|                                | gi 24650092                       | CG12250 | 16.5             |                        | •          | •          |                       |                             | n.h.         |                  |
|                                | gi 24649433                       | CG13597 | 59.2             |                        | •          |            | Bromodomain           |                             | n.h.         |                  |
|                                | gi 24641727                       | CG1622  | 45.4             |                        | •          |            | PRP38-domain          | pre-mRNA splicing (?)       | PRPF38B      | 64.5             |
|                                | gi 28571193                       | CG5877  | 114.2            |                        |            | •          | DUF1740 domain        |                             | n.h.         |                  |
| mst101(2)                      | gi 24653446                       | CG6209  | 69.0             |                        |            | •          |                       |                             | n.h.         |                  |
| Gcn2                           | gi 17137328                       | CG1609  | 178.5            |                        | •          | •          | RWD, S/T kinase, aaRS |                             | EIF2AK4      |                  |
| <b>Zeste only</b>              |                                   |         |                  |                        |            |            |                       |                             |              |                  |
|                                | gi 116007820                      | CG7255  | 85.6             | •                      |            |            | amino acid permease   | amino acid transport (?)    | SLC7A2       | 71.7             |
| Neos                           | gi 17647723                       | CG8614  | 42.6             | •                      |            |            | RRM                   |                             | NCOA5        | 65.5             |
|                                | gi 24645889                       | CG17187 | 34.7             | •                      |            |            | DNAJ domain           |                             | DNAJC17      | 34.7             |
|                                | gi 19921082                       | CG5343  | 23.3             | •                      |            |            | DUF667 domain         | transcription(?)            | TFIIB        | 22.6             |
